# Supplementary material for: Polyacrylonitrile-grafted lignin copolymer derived carbon nanofibers as a flexible electrode for high-performance capacitive-energy storage
Source: Royal Society of Chemistry journal article supplement (doi:10.1039/d3ma00194f), 2023-01-01
Supplement: d3ma00194f1.pdf [file d3ma00194f1.pdf]

## **SUPPORTING INFORMATIONS**

### **Polyacrylonitrile-grafted lignin copolymer derived carbon nanofibers as flexible electrodes for high performance capacitive energy storage**

Da-Young Kim <sup>a</sup>, Sivaprakasam Radhakrishnan <sup>b</sup>, Seungmin Yu <sup>a</sup> and Byoung-Suhk Kim <sup>a,b\*</sup>

*<sup>a</sup> Department of Carbon Composites Convergence Materials Engineering, Jeonbuk National University, 567 Baekje-daero, Deokjin-gu, Jeonju-si, Jeollabuk-do 54896, Republic of Korea*

*<sup>b</sup> Department of Organic Materials & Textile Engineering, Jeonbuk National University, 567 Baekje-daero, Deokjin-gu, Jeonju-si, Jeollabuk-do 54896, Republic of Korea*

\*Corresponding author: *E-mail address:* kbsuhk@jbnu.ac.kr (B. S. Kim)

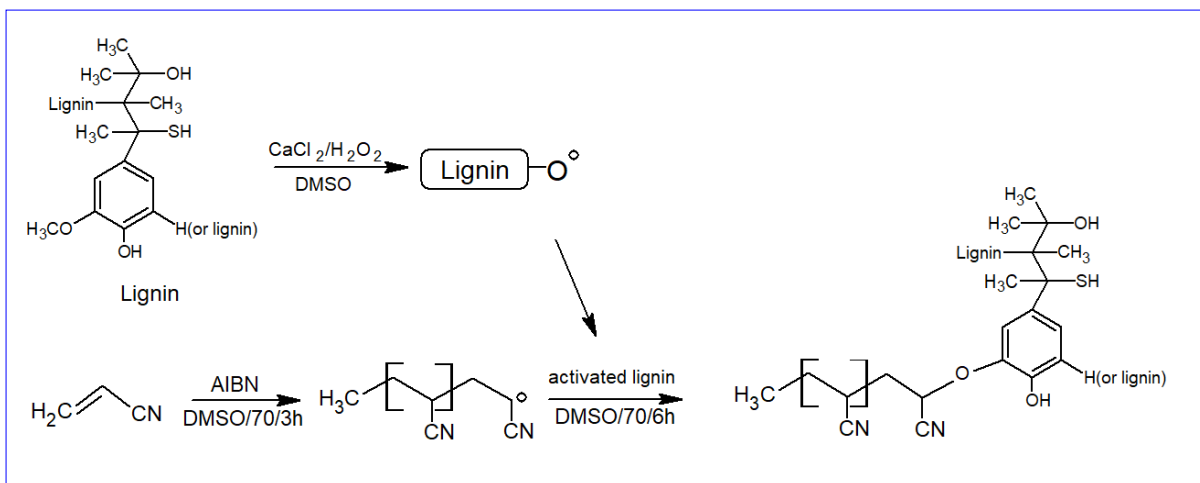

**Fig. S1** Schematic illustration for the formation mechanism of PAN-g-lignin.

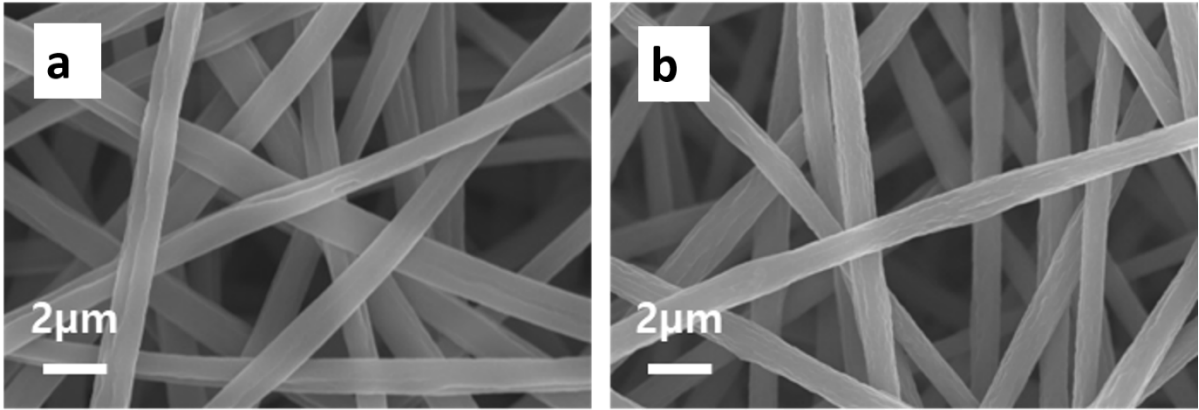

**Fig. S2** FE-SEM images of carbonized PAN-g-lignin nanofibers at 800 °C (a) and 1200 °C (b).

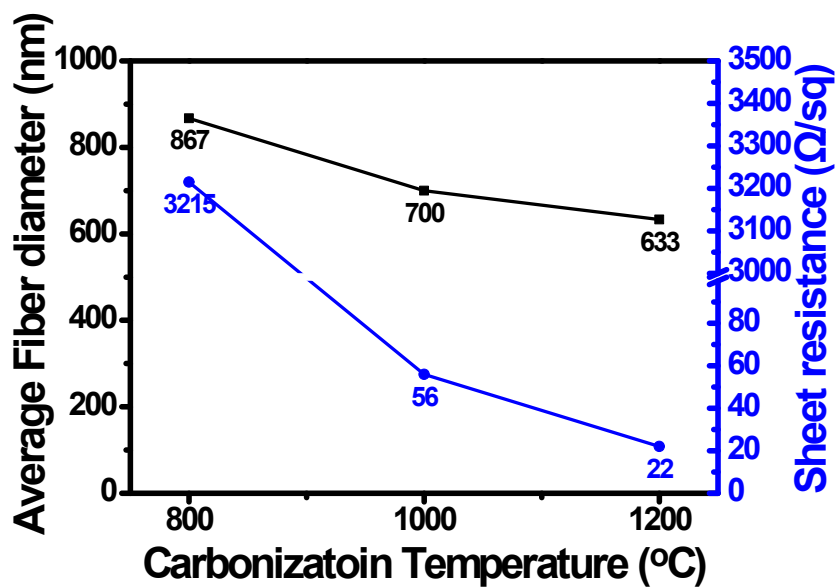

Fig. S3 Plot of Fiber diameter and Sheet resistance against carbonization temperature.

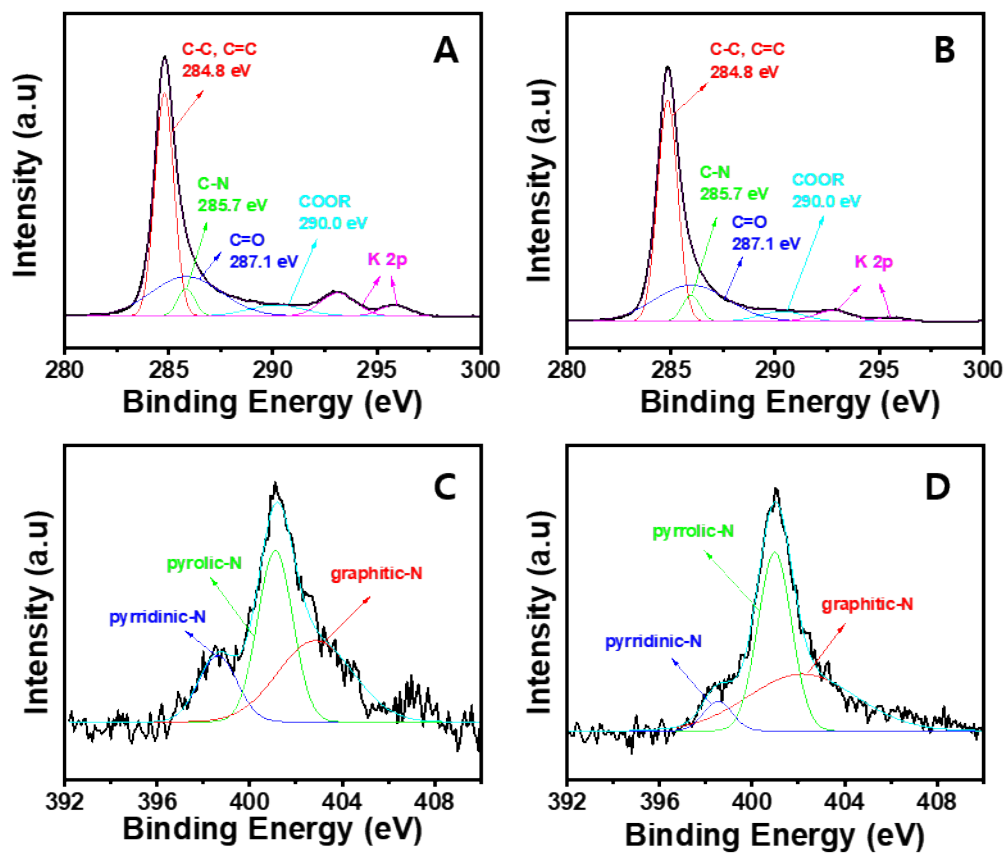

**Fig. S4** High-resolution XPS spectra of C 1s and N 1s for C-800 (A & C) and C-1200 (B & D), respectively.

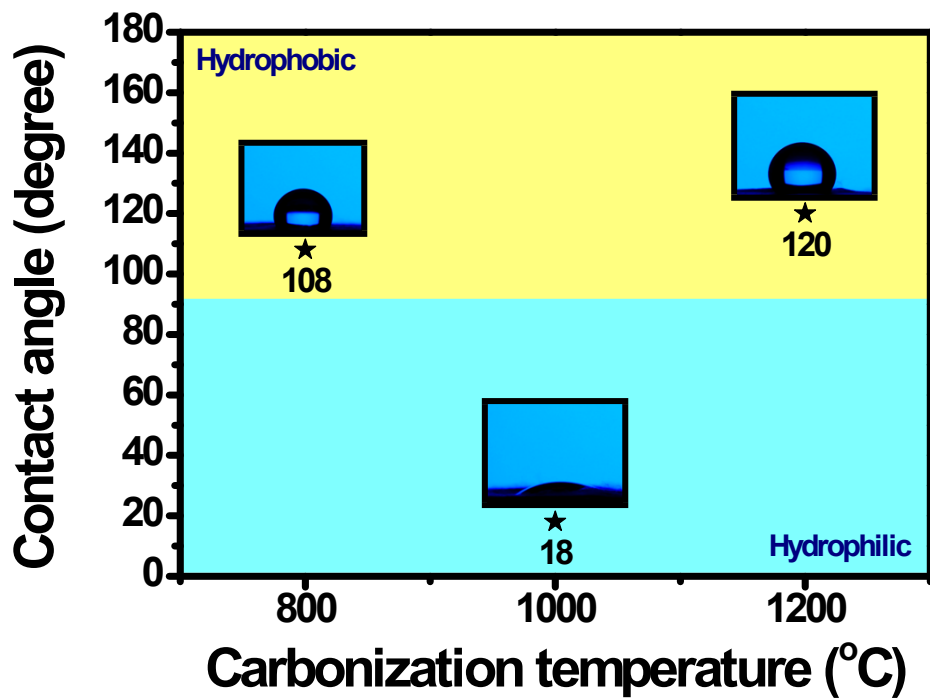

Fig. S5 Water contact angle of CNFs derived at different carbonization temperature.

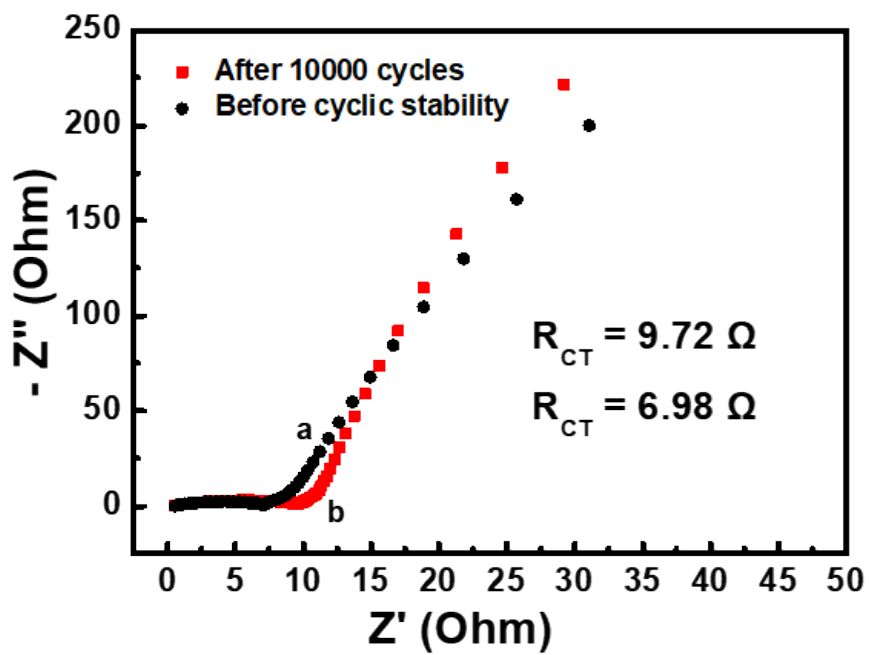

Fig. S6 EIS spectra of CNFs (C-1000) electrode before and after cyclic stability measurements

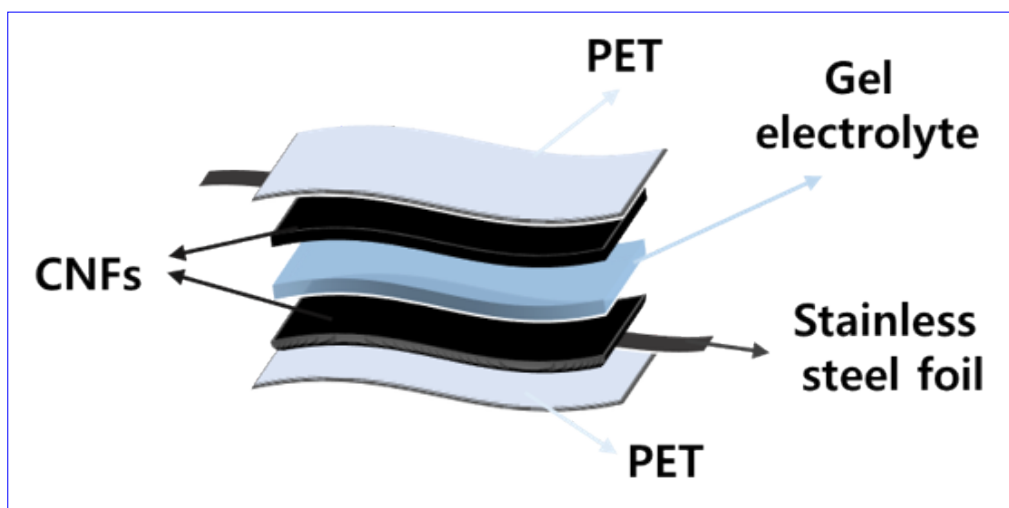

**Fig. S7** Schematic illustration for the fabrication of solid-state symmetric supercapacitor (SSC) device



**Table S1** Supercapacitor performance comparison with literature reports.

| Electrode Materials         | Specific capacitance        | Energy density (Wh/kg)   | Power density (W/kg)    | Electrolyte                        | Ref.        |
|-----------------------------|-----------------------------|--------------------------|-------------------------|------------------------------------|-------------|
| Porous carbon nanofiber     | 256 F g <sup>-1</sup>       | 35.6                     | 128                     | H <sub>2</sub> SO <sub>4</sub>     | [1]         |
| Cotton stalk                | 111 F g <sup>-1</sup>       | 12.5                     | 900                     | KOH                                | [2]         |
| NiO/Carbon microfibers      | 284 F g <sup>-1</sup>       | 154 mWh/cm <sup>2</sup>  | 2801 mW/cm <sup>2</sup> | KOH                                | [3]         |
| CNT//CNT/MoO <sub>3</sub>   | 3.0 F cm <sup>-3</sup>      | 1.5 mWh cm <sup>-3</sup> | 4.2 W cm <sup>-3</sup>  | H <sub>2</sub> SO <sub>4</sub>     | [4]         |
| Carbon nanofibers           | 210                         | 27.2                     | 508                     | KOH                                | [5]         |
| Carbon nanofibers           | 204 F g <sup>-1</sup>       | --                       | --                      | H <sub>2</sub> SO <sub>4</sub>     | [6]         |
| Activated-carbon nanofibers | 192 F g <sup>-1</sup>       | --                       | --                      | KOH                                | [7]         |
| Carbon nanofiber aerogel    | 1066 F g <sup>-1</sup>      | 30                       | 501                     | Na <sub>2</sub> SO <sub>4</sub>    | [8]         |
| N-doped carbon nanofibers   | 644 F g <sup>-1</sup>       | 33                       | 800                     | PVA-KOH                            | [9]         |
| ZnO-Carbon nanofibers       | 216 F g <sup>-1</sup>       | 29.7                     | 30                      | KOH                                | [10]        |
| <b>MnO</b>                  | <b>545 F g<sup>-1</sup></b> | <b>27</b>                | <b>176</b>              | <b>KOH</b>                         | <b>[11]</b> |
| <b>N-doped carbon</b>       | <b>250 F g<sup>-1</sup></b> | <b>22.3</b>              | <b>100</b>              | <b>KOH</b>                         | <b>[12]</b> |
| Carbon nanofibers           | 137 F g <sup>-1</sup>       | 33                       | 800                     | PVA-H <sub>2</sub> SO <sub>4</sub> | This work   |

## References

[1] E. Taer, N.Y. Effendi, R. Taslim, A. Apriwandi, Interconnected micro-mesoporous carbon nanofiber derived from lemongrass for symmetric supercapacitor performance, *Journal of*

*Materials Research and Technology*, 2022, **19**, 4721-4732.

[2] J. Tian, T. Zhang, D. Talifu, A. Abulizi, Y. Ji, Porous carbon materials derived from waste cotton stalk with ultra-high surface area for high performance supercapacitors, *Materials Research Bulletin*, 2021, **143**, 111457.

[3] N. Parveen, A.A. Sajid, A-A.T. Batool, M.O. Ansari, Fabrication of binder-free hierarchical three dimensional NiO nanoflakes@carbon nanofibers for superior symmetric supercapacitor applications, *Journal Energy Storage*, 2022, **55**, 105619.

[4] X. Xiao, T. Li, Z. Peng, H. Jin, Q. Zhong, Q. Hu, B. Yao, Q. Luo, C. Zhang, L. Gong, J. Chen, Y. Gogotsi, J. Zhou, Freestanding functionalized carbon nanotube-based electrode for solid-state asymmetric supercapacitors, *Nano Energy*, 2014, **6**, 1-9.

[5] H. Liu, W. Song, A. Xing, In situ K<sub>2</sub>S activated electrospun carbon nanofibers with hierarchical meso/microporous structures for supercapacitors, *RSC Advances*, 2019, **9**, 33539.

[6] R. Singhal, V. Kalra, Using common salt to impart pseudocapacitive functionalities to carbon nanofibers, *J. Mater. Chem.*, 2015, **3**, 377.

[7] W. Qian, X. Li, X. Zhu, Z. Hu, X. Shang, G. Luo, H. Yao, Preparation of activated carbon nanofibers using degradative solvent extraction products obtained from low-rank coal and their utilization in supercapacitors, *RSC Advances*, 2020, **10**, 8172-8180.

[8] F. Lai, Y. Huang, L. Zuo, H. Gu, Y-E. Miao, T. Liu, Electrospun nanofiber-supported carbon aerogel as a versatile platform towards asymmetric supercapacitors, *J. Mater. Chem. A*, 2016, **4**, 15861-15869.

[9] Z. Li, J. Bu, C. Zhang, L. Chen, D. Pan, Z. Chen, M. Wu, Electrospun carbon nanofibers embedded with MOF-derived N-doped porous carbon and ZnO quantum dots for asymmetric flexible supercapacitors, *New Journal Chemistry*, 2021, **45**, 10672.

[10] S. Shi, X. Zhuang, B. Cheng, X. Wang, Solution blowing of ZnO nanoflakes-encapsulated carbon nanofibers as electrodes for supercapacitors, *J. Mater. Chem. A*, 2013, **1**, 13779-13788.

[11] W. Guo, X. Guo, L. Yang, T. Wang, M. Zhang, G. Duan, X. Liu, Y. Li, Synthetic melanin facilitates MnO supercapacitors with high specific capacitance and wide operation potential window, *Polymer*, 2021, **235**, 124276.

[12] Y. Wang, H. Li, W. Yang, S. Jian, C. Zhang, G. Duan, One step activation by ammonium chloride towards N-doped porous carbon from camellia oleifera for supercapacitor with high specific capacitance and rate capability, *Diamond & Related Materials*, 2022, **130**, 109526.
